# Supplementary material for: Epigenetic Role of Histone Lysine Methyltransferase and Demethylase on the Expression of Transcription Factors Associated with the Epithelial-to-Mesenchymal Transition of Lung Adenocarcinoma Metastasis to the Brain
Source: PubMed Central journal article supplement (PMC7761791; doi:10.3390/cancers12123632), 2020-12-04
Supplement: cancers-12-03632-s001.pdf [file cancers-12-03632-s001.pdf]

Article

# Epigenetic Role of Histone Lysine Methyltransferase and Demethylase on the Expression of Transcription Factors Associated with the Epithelial-to-Mesenchymal Transition of Lung Adenocarcinoma Metastasis to the Brain

Young Min Lee, Seok Hyun Kim, Minseok S. Kim, Dae Cheol Kim, Eun Hee Lee, Ju Suk Lee, Sung-Hun Lee and Young Zoon Kim

**Table S1.** The lists of primary antibodies for immunohistochemical staining of EMT/MET markers, transcription factors, and histone modification enzymes on the lung adenocarcinoma and brain metastasis in the paired samples.

| Primary antibody                                     | Catalog Number | Dilution Ratio | Manufacturer                          |
|------------------------------------------------------|----------------|----------------|---------------------------------------|
| Epithelial markers                                   |                |                |                                       |
| E-cadherin monoclonal antibody                       | ab1416         | 1:100          | Abcam plc., Cambridge, UK             |
| Ocludins monoclonal antibody                         | ab216327       | 1:200          | Abcam plc., Cambridge, UK             |
| Desmoplakin monoclonal antibody                      | ab16434        | 1:100          | Abcam plc., Cambridge, UK             |
| $\alpha$ -catenin polyclonal antibody                | PA5-36,046     | 1:100          | Invitrogen Co., CA, USA               |
| $\beta$ -catenin monoclonal antibody                 | ab32572        | 1:500          | Abcam plc., Cambridge, UK             |
| type IV collagen polyclonal antibody                 | ab6586         | 1:500          | Abcam plc., Cambridge, UK             |
| Mesenchymal markers                                  |                |                |                                       |
| N-cadherin polyclonal antibody                       | ab76057        | 1:100          | Abcam plc., Cambridge, UK             |
| Vimentin monoclonal antibody                         | ab92547        | 1:200          | Abcam plc., Cambridge, UK             |
| Fibronectin polyclonal antibody                      | ab2413         | 1:50           | Abcam plc., Cambridge, UK             |
| $\alpha 5\beta 1$ integrin polyclonal antibody       | MAB1969        | 1:50           | Chemicon Inc., CA, USA                |
| $\alpha \gamma \beta 6$ integrin polyclonal antibody | orb100289      | 1:500          | Biorbyt LLC., MO, USA                 |
| type I collagen polyclonal antibody                  | ab34710        | 1:200          | Abcam plc., Cambridge, UK             |
| Transcription factors                                |                |                |                                       |
| Snail polyclonal antibody                            | orb180479      | 1:500          | Biorbyt LLC., MO, USA                 |
| Slug polyclonal antibody                             | GTX121924      | 1:100          | GeneTex Inc., CA, USA                 |
| Twist polyclonal antibody                            | ab50581        | 1:500          | Abcam plc., Cambridge, UK             |
| ZEB1 monoclonal antibody                             | ab180905       | 1:500          | Abcam plc., Cambridge, UK             |
| FOXC2 polyclonal antibody                            | PA5-24,588     | 1:50           | Invitrogen Co., CA, USA               |
| Histone methyltransferase                            |                |                |                                       |
| MLL4 monoclonal antibody                             | ab56770        | 1:200          | Abcam plc., Cambridge, UK             |
| RIZ polyclonal antibody                              | LS-C324276     | 1:100          | LSBio Inc., WA, USA                   |
| EZH2 polyclonal antibody                             | ab191080       | 1:250          | Abcam plc., Cambridge, UK             |
| NSD2 polyclonal antibody                             | ab137429       | 1:100          | Abcam plc., Cambridge, UK             |
| Histone demethylase                                  |                |                |                                       |
| LSD1 polyclonal antibody                             | ab17721        | 1:50           | Abcam plc., Cambridge, UK             |
| JMJD1 monoclonal antibody                            | ab91252        | 1:500          | Abcam plc., Cambridge, UK             |
| UTX polyclonal antibody                              | ab235989       | 1:200          | Abcam plc., Cambridge, UK             |
| JMJD5 monoclonal antibody                            | sc-377,078     | 1:50           | Santa Cruz Biotechnology Inc. TX, USA |

Abbreviations: EMT, epithelial-to-mesenchymal transition; MET, mesenchymal-to-epithelial transition.

**Table S2.** The lists of primers for quantitative reverse transcription–polymerase chain reaction for mRNA of the candidate genes of transcription factors associated with epithelial-to-mesenchymal transition, and histone modification enzymes on the lung adenocarcinoma and brain metastasis.

| Primer                    | Forward Sequence        | Reverse Sequence        |
|---------------------------|-------------------------|-------------------------|
| Transcription factors     |                         |                         |
| Snail                     | TGCCCTCAAGATGCACATCCGA  | GGGACAGGAGAAGGGCTTCTC   |
| Slug                      | ATCTGCGGCAAGGCGTTTTCCA  | GAGCCCTCAGATTTGACCTGTC  |
| Twist                     | GCCAGGTACATCGACTTCCTCT  | TCCATCCTCCAGACCGAGAAGG  |
| ZEB1                      | GGCATAACCTACTCAACTACGG  | TGGGCGGTGTAGAATCAGAGTC  |
| FOXC2                     | TCACCTTGAACGGCATCTACCAG | TGACGAAGCACTCGTTGAGCGA  |
| Histone methyltransferase |                         |                         |
| MLL4                      | GGAATGGGTAGCTCTTTGGCGA  | TGCCGAATCAGCAGCTCTCGTA  |
| RIZ                       | TTGGGCTTGCTCAGGAGAAGAG  | GCTGCTATCTCAGGGTTGTCTTC |
| EZH2                      | GACCTCTGTCTTACTTGTGGAGC | CGTCAGATGGTGCCAGCAATAG  |
| NSD2                      | TGTGTGAGCTGCCATGCTTCCA  | TGAGCATCCTGCTGCCAGACAA  |
| Histone demethylase       |                         |                         |
| LSD1                      | TCAGGAGTTGGAAGCGAATCCC  | GTTGAGAGAGGTGTGGCATTAGC |
| JMJD1                     | GCCAACATTGGAGACCACTTCTG | CTCGAACACCTTTGACAGCTCG  |
| UTX                       | AGCGCAAAGGAGCCGTGGAAAA  | GTCGTTACCATTAGGACCTGC   |
| JMJD5                     | CACAGATGAGGAATGGTCCCAG  | GCTGATGTCCTGCTTCAACTCC  |
| Control                   |                         |                         |
| GAPDH                     | GTCTCCTCTGACTTCAACAGCG  | ACCACCCTGTTGCTGTAGCCAA  |

**Publisher's Note:** MDPI stays neutral with regard to jurisdictional claims in published maps and institutional affiliations.

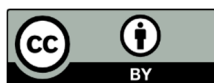

© 2020 by the authors. Licensee MDPI, Basel, Switzerland. This article is an open access article distributed under the terms and conditions of the Creative Commons Attribution (CC BY) license (<http://creativecommons.org/licenses/by/4.0/>).
